# Supplementary material
Source: Oxford University Press journal article supplement (http://www.oxfordjournals.org/our_journals/semitj/supplement22toc.pdf)
Supplement: Supplementary file 1 [file supplement22toc.pdf]

## CONTENTS

|                                                      |     |
|------------------------------------------------------|-----|
| PREFACE                                              | v   |
| ACKNOWLEDGMENTS                                      | vi  |
| CHAPTER ONE                                          |     |
| The Author's World: The Case of al-Ṭayyib Ṣāliḥ      | 1   |
| Some Notes on his World                              | 1   |
| The Author and Modern Sudanese Literature            | 7   |
| Possible Sources of Impact                           | 11  |
| Translations and the Critical Reception of his Works | 16  |
| Comparison of Textual Versions                       | 20  |
| CHAPTER TWO                                          |     |
| Poetic Elements in al-Ṭayyib Ṣāliḥ's Works           | 25  |
| Titles                                               | 25  |
| Dedications                                          | 38  |
| Expositions                                          | 40  |
| Endings                                              | 50  |
| Dialogues and Monologues                             | 58  |
| Place, Space and Time                                | 66  |
| CHAPTER THREE                                        |     |
| Status of the Characters in al-Ṭayyib Ṣāliḥ's Works  | 75  |
| Importance of the Characters                         | 75  |
| <i>Dawmat Wad Ḥāmid</i>                              | 80  |
| Two Later Short Stories                              | 90  |
| <i>'Urs al-Zayn</i>                                  | 93  |
| <i>Mawsim al-Hijra ilā al-Shamāl</i>                 | 100 |
| <i>Bandar Shāh: Ḍaw al-Bayt</i>                      | 123 |
| <i>Bandar Shāh: Maryūd</i>                           | 129 |
